# Supplementary material for: The Polyubiquitin Gene MrUBI4 Is Required for Conidiation, Conidial Germination, and Stress Tolerance in the Filamentous Fungus Metarhizium robertsii
Source: PubMed Central journal article supplement (PMC6627135; doi:10.3390/genes10060412), 2019-05-29
Supplement: genes-10-00412-s001.pdf [file genes-10-00412-s001.pdf]

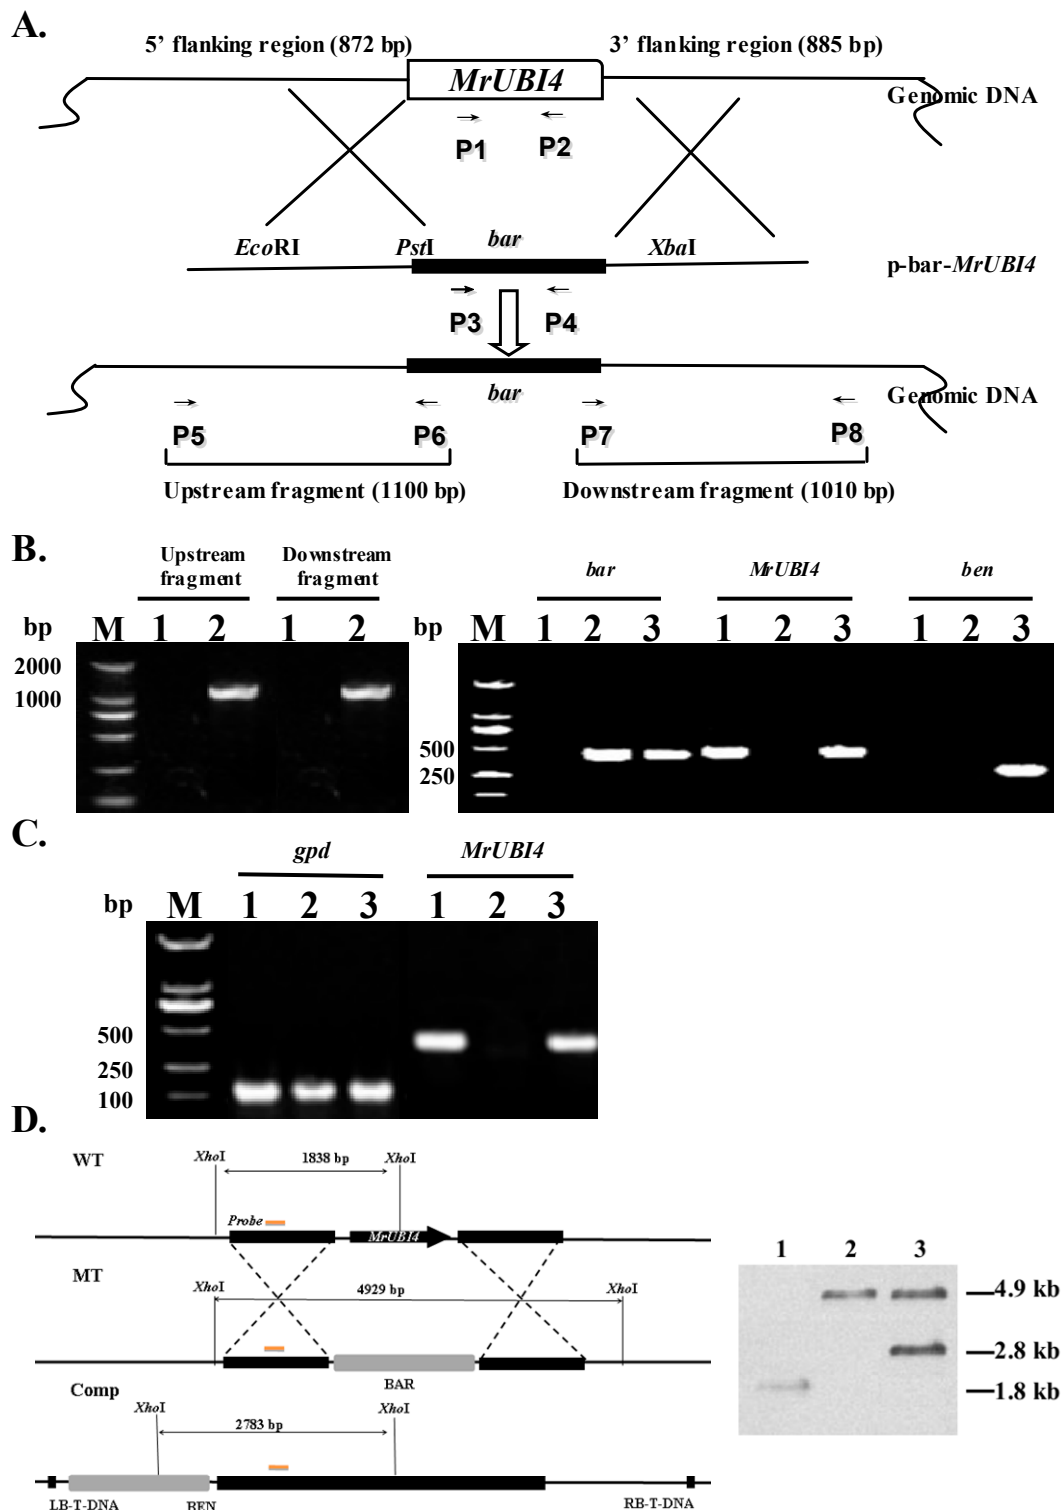

**Figure S1.** *MrUBI4* gene deletion in *M. robertsii*. (A) Schematic diagram of *MrUBI4* gene disruption based on the homologous recombination approach. The 1118-bp fragment (including the *MrUBI4* coding region) was replaced by the 942-bp *bar* cassette via homologous recombination of the overlapping regions of the 5' and 3' fragments in *MrUBI4* and *pbar-MrUBI4* (recombinant vector), respectively. The corresponding locations of the primers are shown with arrows. (B) PCR confirmation assay. Genomic DNAs extracted from the different strains were used as templates for

PCR. The upstream fragment, downstream fragment, *MrUBI4*, *bar*, and *ben* were amplified using the primer sets P5/P6, P7/P8, P1/P2, P3/P4, and *ben-F/ben-R*, respectively (Table 1). A P5/P6 and P7/P8 amplified 1100-bp and 1010-bp recombinant fragment is only present in the  $\Delta MrUBI4$  mutant, and not in the WT (*left panel*). *MrUBI4* was amplified using the primer sets P1/P2 from WT and Comp, and not from  $\Delta MrUBI4$ . The glufosinate-ammonium-resistance gene (*bar*) was amplified using the primer sets P3/P4 from the  $\Delta MrUBI4$  and Comp mutants, and not from WT. The benomyl-resistance gene (*ben*) was amplified only with the primer sets *ben-F/ben-R* from Comp, and not from WT and  $\Delta MrUBI4$  (*right panel*). M: Marker; 1: WT (wild-type strain), 2: MT ( $\Delta MrUBI4$  strain), 3: Comp (complementary strain). (C) RT-PCR assay to verify *MrUBI4* for *MrUBI4* gene expression in the WT,  $\Delta MrUBI4$ , and Comp strains. Using cDNA as the template, the *MrUBI4* partial sequence was amplified with the primer sets P1/P2 from WT and Comp, but not from  $\Delta MrUBI4$ . Thus, our results show that the *MrUBI4* transcripts are completely undetectable in the  $\Delta MrUBI4$  gene-deletion mutant; however, it is detectable in the WT and Comp strains. *gpd* was used as an internal control. M: Marker; 1: WT (wild-type strain), 2: MT ( $\Delta MrUBI4$  strain), 3: Comp (complementary strain). (D) Southern blot assay. Schematic diagram of the enzymatic digestion of genomic DNAs from different strains (*left panel*) and hybridization (*right panel*). Southern blot assay was performed using *XhoI*-digested genomic DNAs from the WT,  $\Delta MrUBI4$ , and Comp strains. As expected, WT showed a 1.8-kb fragment, whereas  $\Delta MrUBI4$  showed a 4.9-kb fragment, which was also present in Comp (as it was generated based on  $\Delta MrUBI4$ ). An additional 2.8-kb fragment was also observed in Comp. The results of the Southern blot analysis indicate the integration of a single copy of the disruption cassette at the *MrUBI4* locus in the  $\Delta MrUBI4$  strain. The blot was probed with the 5' fragment of *MrUBI4*. Lane 1: WT (wild-type strain), Lane 2: MT ( $\Delta MrUBI4$  strain), Lane 3: Comp (complementary strain).

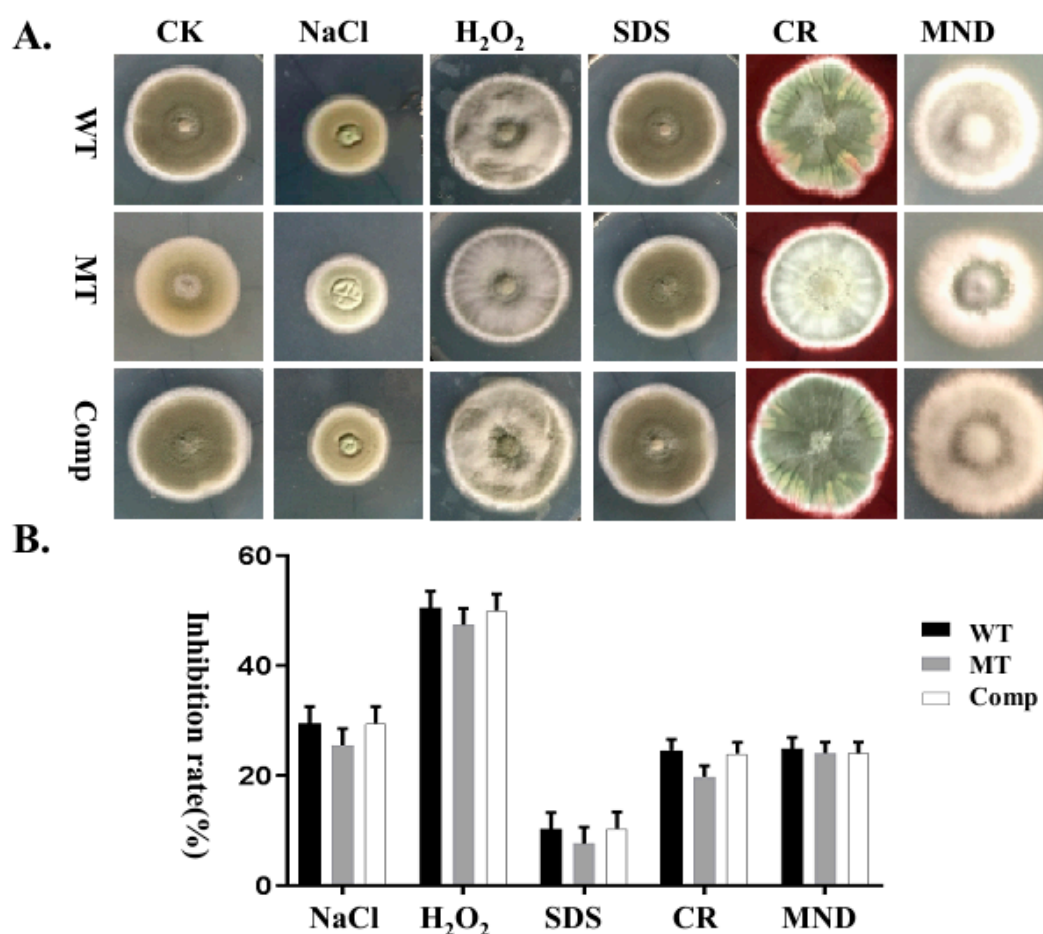

**Figure S2.** Effects of chemical stress on the growth of different strains. (A) Vegetative growth of the three strains on the PDA medium supplemented with different chemicals was compared after growing for 10 days at 25 °C. (B) Statistical analyses of the inhibition rates in the different chemical

stress assay. SDS: Sodium dodecyl sulfate, CR: Congo red, MND: menadione. WT: wild-type strain, MT:  $\Delta MrUBI4$  strain, Comp: complemented strain.

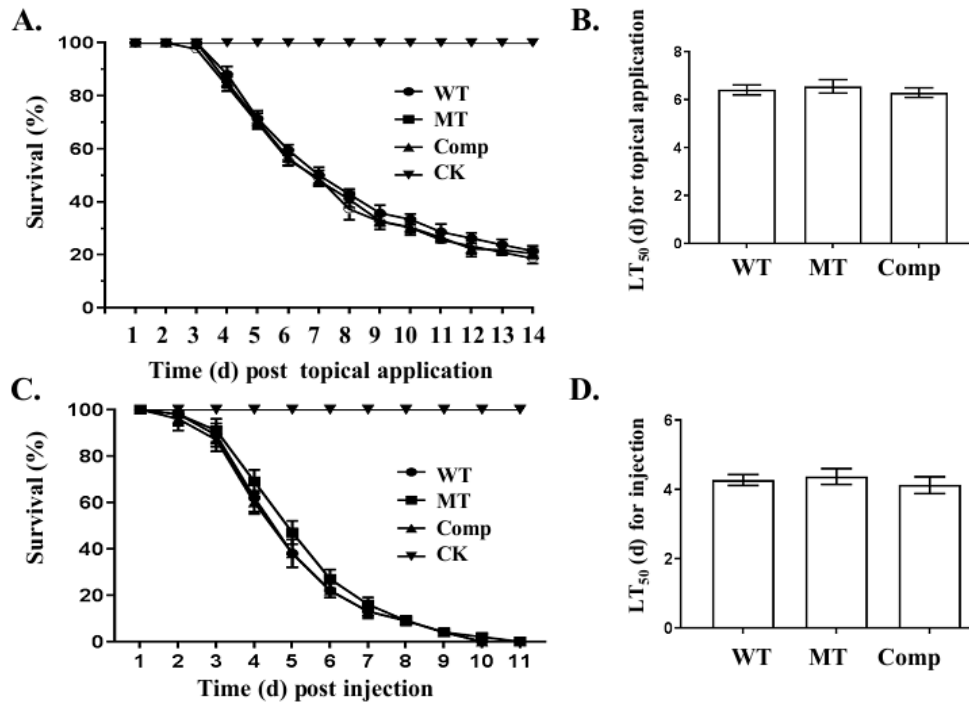

**Figure S3. Fungal virulence assays of different *M. robertsii* strains.** (A) Survival of *Galleria mellonella* after topical application of conidial suspension from WT, MT and Comp strains, respectively. Control insects were treated with sterile 0.05% Tween-80 solution. (B)  $LT_{50}$  (days) of the WT, MT and Comp strains after topical inoculation. (C) Survival of *G. mellonella* after injection of conidial suspension from WT, MT and Comp strains, respectively. Control insects were injected with 5  $\mu$ l sterile H<sub>2</sub>O. (D)  $LT_{50}$  (days) of the WT, MT and Comp strains after injection. WT: wild-type strain, MT:  $\Delta MrUBI4$  strain, Comp: complemented strain, CK: control.

**Table S1. Primers used for qRT-PCR analysis of conidiation-associated and heat stress-related genes**

| Gene                                       | Accession number | Annotation                                                          | Sequence of primer sets (5'- 3')           |
|--------------------------------------------|------------------|---------------------------------------------------------------------|--------------------------------------------|
| <b>Involved in conidiation</b>             |                  |                                                                     |                                            |
| <i>flbA</i>                                | MAA_06313        | Developmental regulator flbA                                        | ACTCCAAAGGGCATCACG /CAACAAAGCGGCGGAATA     |
| <i>flbB</i>                                | MAA_00196        | BZIP-type transcription factor                                      | TCCACGCTGCTTGATT /CCTCACTTTGCGACCC         |
| <i>flbC</i>                                | MAA_08443        | Putative zinc finger protein C                                      | GCAGCATCACCCTACCT /TTAAACGGCTTCTCCC        |
| <i>flbD</i>                                | MAA_03655        | Conidiophore development protein                                    | AACGATGGGCTGAGATTG /GGTGATTGAGTTTCGGATG    |
| <i>fluG</i>                                | MAA_00122        | protein fluG                                                        | TGCGGGTTGAATACGG /CTCCACCTCTTTCTCCTTGA     |
| <i>brlA</i>                                | MAA_10599        | C <sub>2</sub> H <sub>2</sub> conidiation transcription factor BrlA | CAACAGCAGGAATCGC /GCTTATCGGCTGACTTTG       |
| <i>abaA</i>                                | MAA_00694        | Conidiation transcription factor AbaA                               | AAACCACTATTCCTGCTCC /AGCCTGCCTGTTACGATA    |
| <i>wetA</i>                                | MAA_02845        | Conidial maturation factor WetA                                     | CGACGAAATAGGAAAGCA /TGAAGTGAGGAGATACGG     |
| <i>vosA</i>                                | MAA_05862        | Protein VosA                                                        | ACCGAAATCGTGAGTG /GTTGCCCTTCTTGATG         |
| <i>StuA</i>                                | MAA_02988        | APSES transcription factor                                          | GCAAGGCACCAACCCACT /TGCTGCTCCGTAGGCTGA     |
| <i>cag8</i>                                | DQ826044.1       | Conidiation-associated gene 8                                       | AAGCTGATGGCTAGCGTAAG /TTGCGGTTGGAACGACTTTG |
| <i>mero-Fus3</i>                           | MAA_04503        | Mitogen-activated protein kinase Mero-Fus3                          | GGCTCTAAAGCATCC /TCTTTGCTCAGGGTA           |
| <i>Pks1</i>                                | MAA_07745        | Polyketide synthases 1                                              | AGGCGGCAATCCAGT /TGACGAAATCAAACAGC         |
| <i>Mlac1</i>                               | MAA_07747        | Laccase 1                                                           | GGCCTCCTCGTATTTTGTC /GAAAGCGTCCTCAACCAGAC  |
| <b>Involved in response to heat stress</b> |                  |                                                                     |                                            |
| <i>hsp30a</i>                              | MAA_07190        | Heat shock protein 30                                               | CTTCGCACAAGGCCACC / GAGAACTCGCCGACGCT      |
| <i>hsp30b</i>                              | MAA_04014        | Heat shock protein 30                                               | CTGAGCCCCGAGGAGAAG / GACACGGTTGGGAAAGT     |
| <i>hsp40a</i>                              | MAA_02497        | Heat shock protein 40                                               | AGCGAGGCGAGGTGAA / GGTGGTGGCAGCATT         |
| <i>hsp40b</i>                              | MAA_03231        | Heat shock protein 40                                               | AGAGGAAGCCAACGACG / TCCGCAAGAGTAACAACGAG   |
| <i>hsp40c</i>                              | MAA_06393        | Heat shock protein 40                                               | CGCCAACAGGAAAGACT / GCCGTGGTAAGAGGAAT      |
| <i>hsp60</i>                               | MAA_07685        | Heat shock protein 60                                               | CGGCCAACTTTGACCAG / CAATGACAACGGAACCCT     |
| <i>hsp70b</i>                              | MAA_00810        | Heat shock protein 70                                               | TTCAAAGAGGGATACCACC / CAACTTGTCCGGAAGAATGA |
| <i>hsp90</i>                               | MAA_04726        | Heat shock protein 90                                               | TATGTCCGCCGTGTCTT / TGTTCTGCTGGAGGGTC      |
| <i>hsp104</i>                              | MAA_03534        | Heat shock protein 104                                              | TCTGCGGTCCCTCTGGT / CGGCTAAGTGCGTGTGCG     |
| <i>tps</i>                                 | MAA_04676        | Trehalose-6-phosphate synthase                                      | GTATGCCTCGTCTCCTCG / GCCAGTTCCTCCGTGTT     |
| <i>nth</i>                                 | MAA_04403        | Neutral trehalase                                                   | CGAGCGTCTGGCCTACA / CCTTCTTTGGCAACACC      |

|            |           |                                     |                                          |
|------------|-----------|-------------------------------------|------------------------------------------|
| <i>mtd</i> | MAA_09034 | Mannitol dehydrogenase              | GTCATCACGGCGTCCAT / GAGGCCAGTGTCGATGTAG  |
| <i>mpd</i> | MAA_08216 | Mannitol-1-phosphate dehydrogenase  | ACGAGTTTGAGGAGGATG / CGAGAAAGTTTACGCAGAG |
| <i>tpp</i> | MAA_09905 | Trehalose-6-phosphate phosphorylase | CGTGCGGTCTTATTGTCC / CGTTTGAGGGATTGGATG  |

#### Involved in response to DNA damage

|              |           |                                                         |                                     |
|--------------|-----------|---------------------------------------------------------|-------------------------------------|
| <i>wc</i>    | MAA_04453 | white collar 1                                          | CCTTATCCTCGGTTTG / CTTTGCTTCCGTCTTA |
| <i>phr</i>   | MAA_01734 | putative regulator of deoxyribodipyrimidine photo-lyase | CTCGTCGGTGTATCAA / TGGGCTCGGAGGTTTC |
| <i>uve-1</i> | MAA_09725 | UV-endonuclease                                         | GTCGCGTCCGCTGTTA / GCTTGCTCCTTGCCT  |

---
